# Supplementary material for: Blood Pressure Targets for Out-of-Hospital Cardiac Arrest: A Systematic Review and Meta-Analysis
Source: MDPI journal article supplement (doi:10.3390/jcm12134497), 2023-07-05
Supplement: s1 [file s1]

# Blood Pressure Targets for Out-of-Hospital Cardiac Arrest: A Systematic Review and Meta-Analysis

**Shir Lynn Lim** <sup>1,2,3,\*†</sup>, **Christopher Jer Wei Low** <sup>2†</sup>, **Ryan Ruiyang Ling** <sup>2</sup>, **Rehena Sultana** <sup>4</sup>,  
**Victoria Yang** <sup>5</sup>, **Marcus E. H. Ong** <sup>6,7</sup>, **Yew Woon Chia** <sup>2,8,9</sup>, **Vijay Kumar Sharma** <sup>2,10</sup>  
and **Kollengode Ramanathan** <sup>2,11</sup>

<sup>1</sup> Department of Cardiology, National University Heart Centre Singapore, Singapore 119074, Singapore

<sup>2</sup> Yong Loo Lin School of Medicine, National University of Singapore, Singapore 117597, Singapore; e0474165@u.nus.edu (C.J.W.L.); ryanmedicine30@gmail.com (R.R.L.); yew\_woon\_chia@ttsh.com.sg (Y.W.C.); vijay\_kumar\_sharma@nuhs.edu.sg (V.K.S.); surrkr@nus.edu.sg (K.R.)

<sup>3</sup> Pre-Hospital Emergency Research Center, Duke-NUS Medical School, Singapore 169857, Singapore

<sup>4</sup> Centre for Quantitative Medicine, Duke-NUS Medical School, Singapore 169857, Singapore; rehena.sultana@duke-nus.edu.sg

<sup>5</sup> Imperial College Healthcare NHS Trust, London W12 OHS, UK; victoria.yang@nhs.net

<sup>6</sup> Department of Emergency Medicine, Singapore General Hospital, Singapore 169608, Singapore; marcus.ong@duke-nus.edu.sg

<sup>7</sup> Health Services and Systems Research, Duke-NUS Medical School, Singapore 169857, Singapore

<sup>8</sup> Department of Cardiology, Tan Tock Seng Hospital, Singapore 308433, Singapore

<sup>9</sup> Lee Kong Chian School of Medicine, Nanyang Technological University, Singapore 639798, Singapore

<sup>10</sup> Division of Neurology, National University Health System, Singapore 119074, Singapore

<sup>11</sup> Cardiothoracic Intensive Care Unit, National University Heart Centre Singapore, Singapore 119074, Singapore

\* Correspondence: mdclims@nus.edu.sg; Tel.: +65-6772-3301

† These authors contributed equally to this work.

## Table of Contents

|                                                                                                            |    |
|------------------------------------------------------------------------------------------------------------|----|
| SUPPLEMENTARY TABLE S1: PREFERRED REPORTING ITEMS FOR SYSTEMATIC REVIEWS AND META-ANALYSES CHECKLIST ..... | 3  |
| SUPPLEMENTARY TABLE S2: SEARCH STRATEGY FOR DATABASE .....                                                 | 6  |
| SUPPLEMENTARY TABLE S3: DATA COLLECTION TEMPLATE* .....                                                    | 8  |
| SUPPLEMENTARY TABLE S4a: POOLED DEMOGRAPHICS OF INCLUDED TRIALS .....                                      | 9  |
| SUPPLEMENTARY TABLE S4b: DEMOGRAPHICS OF INCLUDED TRIALS.....                                              | 9  |
| SUPPLEMENTARY TABLE S4c: DEMOGRAPHICS OF OBSERVATIONAL STUDIES IN SENSITIVITY ANALYSIS .....               | 10 |
| SUPPLEMENTARY TABLE S5a: DETAILS OF CARDIAC ARREST IN INCLUDED TRIALS.....                                 | 12 |
| SUPPLEMENTARY TABLE S5b: DETAILS OF CARDIAC ARREST OF OBSERVATIONAL STUDIES IN SENSITIVITY ANALYSIS .....  | 12 |
| SUPPLEMENTARY TABLE S6a: DETAILS OF TREATMENT OF INCLUDED TRIALS .....                                     | 13 |
| SUPPLEMENTARY TABLE S6b: DETAILS OF TREATMENT OF OBSERVATIONAL STUDIES IN SENSITIVITY ANALYSIS.....        | 14 |
| SUPPLEMENTARY TABLE S7a: RISK OF BIAS EVALUATION FOR INCLUDED TRIALS.....                                  | 15 |
| SUPPLEMENTARY TABLE S7b: RISK OF BIAS EVALUATION FOR OBSERVATIONAL STUDIES IN SENSITIVITY ANALYSIS .....   | 15 |
| SUPPLEMENTARY TABLE S8: GRADING OF RECOMMENDATIONS, ASSESSMENT, DEVELOPMENT, AND EVALUATIONS .....         | 16 |
| SUPPLEMENTARY TABLE S9: POOLED DATA FOR SUBGROUP ANALYSIS ON MORTALITY .....                               | 18 |
| SUPPLEMENTARY TABLE S10: TRIAL SEQUENTIAL ANALYSIS FOR OUTCOMES.....                                       | 19 |
| SUPPLEMENTARY TABLE S11: FOREST PLOTS FOR OTHER SECONDARY OUTCOMES .....                                   | 23 |
| SUPPLEMENTARY TABLE S12a: RAW DATA FOR OUTCOMES IN INCLUDED TRIALS.....                                    | 25 |
| SUPPLEMENTARY TABLE S12b: RAW DATA FOR OUTCOMES IN OBSERVATIONAL STUDIES IN SENSITIVITY ANALYSIS .....     | 26 |

**Supplementary Table S1: Preferred Reporting Items for Systematic Reviews and Meta-analyses checklist**

| Section and Topic             | Item # | Checklist item                                                                                                                                                                                                                                                                                       | Location where item is reported   |
|-------------------------------|--------|------------------------------------------------------------------------------------------------------------------------------------------------------------------------------------------------------------------------------------------------------------------------------------------------------|-----------------------------------|
| <b>TITLE</b>                  |        |                                                                                                                                                                                                                                                                                                      |                                   |
| Title                         | 1      | Identify the report as a systematic review.                                                                                                                                                                                                                                                          | Page 1                            |
| <b>ABSTRACT</b>               |        |                                                                                                                                                                                                                                                                                                      |                                   |
| Abstract                      | 2      | See the PRISMA 2020 for Abstracts checklist.                                                                                                                                                                                                                                                         | Page 3                            |
| <b>INTRODUCTION</b>           |        |                                                                                                                                                                                                                                                                                                      |                                   |
| Rationale                     | 3      | Describe the rationale for the review in the context of existing knowledge.                                                                                                                                                                                                                          | Page 5                            |
| Objectives                    | 4      | Provide an explicit statement of the objective(s) or question(s) the review addresses.                                                                                                                                                                                                               | Page 5                            |
| <b>METHODS</b>                |        |                                                                                                                                                                                                                                                                                                      |                                   |
| Eligibility criteria          | 5      | Specify the inclusion and exclusion criteria for the review and how studies were grouped for the syntheses.                                                                                                                                                                                          | Page 6                            |
| Information sources           | 6      | Specify all databases, registers, websites, organisations, reference lists and other sources searched or consulted to identify studies. Specify the date when each source was last searched or consulted.                                                                                            | Page 6                            |
| Search strategy               | 7      | Present the full search strategies for all databases, registers and websites, including any filters and limits used.                                                                                                                                                                                 | Supplementary Table 3             |
| Selection process             | 8      | Specify the methods used to decide whether a study met the inclusion criteria of the review, including how many reviewers screened each record and each report retrieved, whether they worked independently, and if applicable, details of automation tools used in the process.                     | Page 6-7                          |
| Data collection process       | 9      | Specify the methods used to collect data from reports, including how many reviewers collected data from each report, whether they worked independently, any processes for obtaining or confirming data from study investigators, and if applicable, details of automation tools used in the process. | Page 6-7                          |
| Data items                    | 10a    | List and define all outcomes for which data were sought. Specify whether all results that were compatible with each outcome domain in each study were sought (e.g. for all measures, time points, analyses), and if not, the methods used to decide which results to collect.                        | Page 6-8                          |
|                               | 10b    | List and define all other variables for which data were sought (e.g. participant and intervention characteristics, funding sources). Describe any assumptions made about any missing or unclear information.                                                                                         | Page 6-8<br>Supplementary Table 2 |
| Study risk of bias assessment | 11     | Specify the methods used to assess risk of bias in the included studies, including details of the tool(s) used, how many reviewers assessed each study and whether they worked independently, and if applicable, details of automation tools used in the process.                                    | Page 7                            |
| Effect measures               | 12     | Specify for each outcome the effect measure(s) (e.g. risk ratio, mean difference) used in the synthesis or presentation of results.                                                                                                                                                                  | Page 7                            |
| Synthesis methods             | 13a    | Describe the processes used to decide which studies were eligible for each synthesis (e.g. tabulating the study intervention characteristics and comparing against the planned groups for each synthesis (item #5)).                                                                                 | Page 6-8                          |

|                               |     |                                                                                                                                                                                                                                                                                      |                                        |
|-------------------------------|-----|--------------------------------------------------------------------------------------------------------------------------------------------------------------------------------------------------------------------------------------------------------------------------------------|----------------------------------------|
|                               | 13b | Describe any methods required to prepare the data for presentation or synthesis, such as handling of missing summary statistics, or data conversions.                                                                                                                                | Page 7-8                               |
|                               | 13c | Describe any methods used to tabulate or visually display results of individual studies and syntheses.                                                                                                                                                                               | Page 7-8, Supplementary Tables 4-6     |
|                               | 13d | Describe any methods used to synthesize results and provide a rationale for the choice(s). If meta-analysis was performed, describe the model(s), method(s) to identify the presence and extent of statistical heterogeneity, and software package(s) used.                          | Page 7-8                               |
|                               | 13e | Describe any methods used to explore possible causes of heterogeneity among study results (e.g. subgroup analysis, meta-regression).                                                                                                                                                 | Page 7                                 |
|                               | 13f | Describe any sensitivity analyses conducted to assess robustness of the synthesized results.                                                                                                                                                                                         | Page 7                                 |
| Reporting bias assessment     | 14  | Describe any methods used to assess risk of bias due to missing results in a synthesis (arising from reporting biases).                                                                                                                                                              | Page 7, Supplementary Table 7a and 7b  |
| Certainty assessment          | 15  | Describe any methods used to assess certainty (or confidence) in the body of evidence for an outcome.                                                                                                                                                                                | Page 7, Supplementary Table 8          |
| <b>RESULTS</b>                |     |                                                                                                                                                                                                                                                                                      |                                        |
| Study selection               | 16a | Describe the results of the search and selection process, from the number of records identified in the search to the number of studies included in the review, ideally using a flow diagram.                                                                                         | Page 8                                 |
|                               | 16b | Cite studies that might appear to meet the inclusion criteria, but which were excluded, and explain why they were excluded.                                                                                                                                                          | Page 8-9                               |
| Study characteristics         | 17  | Cite each included study and present its characteristics.                                                                                                                                                                                                                            | Page 8, Supplementary Tables 4-6       |
| Risk of bias in studies       | 18  | Present assessments of risk of bias for each included study.                                                                                                                                                                                                                         | Page 9, Supplementary Table 7a and 7b  |
| Results of individual studies | 19  | For all outcomes, present, for each study: (a) summary statistics for each group (where appropriate) and (b) an effect estimate and its precision (e.g. confidence/credible interval), ideally using structured tables or plots.                                                     | Page 9-10, Table 1                     |
| Results of syntheses          | 20a | For each synthesis, briefly summarise the characteristics and risk of bias among contributing studies.                                                                                                                                                                               | Page 8-10, Supplementary Table 4 to 7b |
|                               | 20b | Present results of all statistical syntheses conducted. If meta-analysis was done, present for each the summary estimate and its precision (e.g. confidence/credible interval) and measures of statistical heterogeneity. If comparing groups, describe the direction of the effect. | Page 9-10, Table 1                     |
|                               | 20c | Present results of all investigations of possible causes of heterogeneity among study results.                                                                                                                                                                                       | Page 9-10                              |
|                               | 20d | Present results of all sensitivity analyses conducted to assess the robustness of the synthesized results.                                                                                                                                                                           | Page 9-10                              |

|                                                |     |                                                                                                                                                                                                                                            |                               |
|------------------------------------------------|-----|--------------------------------------------------------------------------------------------------------------------------------------------------------------------------------------------------------------------------------------------|-------------------------------|
| Reporting biases                               | 21  | Present assessments of risk of bias due to missing results (arising from reporting biases) for each synthesis assessed.                                                                                                                    | Supplementary Table 7a and 7b |
| Certainty of evidence                          | 22  | Present assessments of certainty (or confidence) in the body of evidence for each outcome assessed.                                                                                                                                        | Supplementary Table 8         |
| <b>DISCUSSION</b>                              |     |                                                                                                                                                                                                                                            |                               |
| Discussion                                     | 23a | Provide a general interpretation of the results in the context of other evidence.                                                                                                                                                          | Page 11-13                    |
|                                                | 23b | Discuss any limitations of the evidence included in the review.                                                                                                                                                                            | Page 12-13                    |
|                                                | 23c | Discuss any limitations of the review processes used.                                                                                                                                                                                      | Page 12-13                    |
|                                                | 23d | Discuss implications of the results for practice, policy, and future research.                                                                                                                                                             | Page 12-13                    |
| <b>OTHER INFORMATION</b>                       |     |                                                                                                                                                                                                                                            |                               |
| Registration and protocol                      | 24a | Provide registration information for the review, including register name and registration number, or state that the review was not registered.                                                                                             | Page 6                        |
|                                                | 24b | Indicate where the review protocol can be accessed, or state that a protocol was not prepared.                                                                                                                                             | Page 6                        |
|                                                | 24c | Describe and explain any amendments to information provided at registration or in the protocol.                                                                                                                                            | Page 6                        |
| Support                                        | 25  | Describe sources of financial or non-financial support for the review, and the role of the funders or sponsors in the review.                                                                                                              | Page 14                       |
| Competing interests                            | 26  | Declare any competing interests of review authors.                                                                                                                                                                                         | Page 14-15                    |
| Availability of data, code and other materials | 27  | Report which of the following are publicly available and where they can be found: template data collection forms; data extracted from included studies; data used for all analyses; analytic code; any other materials used in the review. | Page 14-15                    |

From: Page MJ, McKenzie JE, Bossuyt PM, Boutron I, Hoffmann TC, Mulrow CD, et al. The PRISMA 2020 statement: an updated guideline for reporting systematic reviews. BMJ 2021;372:n71. doi: 10.1136/bmj.n71

## Supplementary Table S2: Search strategy for database

### Pubmed

| Search no. | Query                                                                                                                                                                                                                                                                                                   | Result  |
|------------|---------------------------------------------------------------------------------------------------------------------------------------------------------------------------------------------------------------------------------------------------------------------------------------------------------|---------|
| 1          | Out-of-hospital cardiac arrest[MeSH] OR Cardiopulmonary Resuscitation[MeSH] OR ((out-of-hospital[Title/Abstract]) AND (cardiac arrest[Title/Abstract])) OR cardiopulmonary arrest[Title/Abstract] OR resuscitation from cardiac arrest[Title/Abstract] OR cardiopulmonary resuscitation[Title/Abstract] | 35,169  |
| 2          | Blood pressure[MeSH] OR Arterial pressure[MeSH] OR systolic blood pressure*[Title/Abstract] OR arterial pressure*[Title/Abstract]                                                                                                                                                                       | 385,724 |
| 3          | #1 AND #2                                                                                                                                                                                                                                                                                               | 1,269   |

### Embase

| Search no. | Query                                                                                                                                                                                                                                                    | Results |
|------------|----------------------------------------------------------------------------------------------------------------------------------------------------------------------------------------------------------------------------------------------------------|---------|
| 1          | 'out of hospital cardiac arrest'/exp OR 'cardiopulmonary resuscitation'/exp OR ('out-of-hospital' NEAR/3 'cardiac arrest'):ti,ab OR 'cardiopulmonary arrest':ti,ab OR 'resuscitation from cardiac arrest':ti,ab OR 'cardiopulmonary resuscitation':ti,ab | 139,479 |
| 2          | 'blood pressure'/exp OR 'arterial pressure'/exp OR 'systolic blood pressure':ti,ab OR 'arterial pressure':ti,ab                                                                                                                                          | 707,343 |
| 3          | #1 AND #2                                                                                                                                                                                                                                                | 13,041  |

### Cochrane

| Search no. | Query                                                                                                                                                        | results |
|------------|--------------------------------------------------------------------------------------------------------------------------------------------------------------|---------|
| 1          | MeSH descriptor: [Out-of-Hospital Cardiac Arrest] explode all trees                                                                                          | 521     |
| 2          | MeSH descriptor: [Cardiopulmonary Resuscitation] explode all trees                                                                                           | 1,247   |
| 3          | ((out-of-hospital)ti,ab NEAR/3 (cardiac arrest)ti,ab) OR (cardiopulmonary arrest OR resuscitation from cardiac arrest OR cardiopulmonary resuscitation)ti,ab | 2,888   |
| 4          | MeSH descriptor: [Blood Pressure] explode all trees                                                                                                          | 28,794  |
| 5          | MeSH descriptor: [Arterial Pressure] explode all trees                                                                                                       | 481     |
| 6          | (systolic blood pressure OR arterial pressure)ti,ab                                                                                                          | 760     |
| 7          | (#1 OR #2 OR #3) AND (#4 OR #5 OR #6)                                                                                                                        | 98      |

**Scopus**

| Search no. | Query                                                                                                                                                     | results |
|------------|-----------------------------------------------------------------------------------------------------------------------------------------------------------|---------|
| 1.         | TITLE-ABS(("out-of-hospital" AND "cardiac arrest") OR "cardiopulmonary arrest" OR "resuscitation from cardiac arrest" OR "cardiopulmonary resuscitation") | 28,441  |
| 2.         | TITLE-ABS ("blood pressure" OR "arterial pressure")                                                                                                       | 452,481 |
| 3.         | #1 AND #2                                                                                                                                                 | 1,234   |

### **Supplementary Table S3: Data collection template\***

**Study characteristics:** Study authors, date of publication, study centres/countries, duration of study, inclusion/exclusion criteria, MAP levels assessed

**Patient demographics:** Sample size, age, number of males, body mass index, cardiac history (prior percutaneous coronary intervention, prior coronary artery bypass, prior myocardial infarction and other relevant cardiac comorbidities), other comorbidities (hypertension, diabetes mellitus, hyperlipidaemia, obesity, chronic obstructive pulmonary disease, smoking, any other comorbidities reported by studies)

**Cardiac arrest characteristics:** Aetiology of arrest, bystander resuscitation, presenting rhythm, time to return of spontaneous circulation, no flow time, low flow time, mean arterial pressure on admission, Sequential Organ Failure Assessment score, other cardiac arrest characteristics as available

**Treatment characteristics:** Angiography done, percutaneous coronary intervention done, Targeted Temperature Management characteristics, inotropes used, complete revascularisation achieved

**Primary outcomes:** Mortality

**Secondary outcomes:** Favourable neurological outcome, arrhythmia, neuron specific enolase levels, other post-cardiac arrest complications as available

\*: Not all prespecified data was available from the studies, and data was extracted where available



**Supplementary Table S4a: Pooled demographics of included trials**

|                              | Higher MAP                     | Lower MAP                      |
|------------------------------|--------------------------------|--------------------------------|
| <b>Pooled mean age/years</b> | 62.37 (95%-CI: 59.89 to 64.85) | 61.97 (95%-CI: 60.27 to 63.68) |
| <b>Proportion of males/%</b> | 80.46 (95%-CI: 76.85 to 83.62) | 80.68 (95%-CI: 77.10 to 83.81) |

**Supplementary Table S4b: Demographics of included trials**

| Study                  | Continent | Hospitals | Location | Sample Size            | Male Patients | Age (years), Mean $\pm$ SD | Weight (kg), Mean $\pm$ SD | Cardiac History                                  | Other Comorbidities                                                                                                |
|------------------------|-----------|-----------|----------|------------------------|---------------|----------------------------|----------------------------|--------------------------------------------------|--------------------------------------------------------------------------------------------------------------------|
| <b>Ameloot 2019</b>    | Europe    | 2         | OHCA     | 102                    | 77 (75.5%)    |                            | N/A                        | MI: 4, CS: 1, HF: 5                              | HTN: 22, DM: 3, COPD: 5, CKD: 5, Stroke: 3                                                                         |
|                        |           |           |          | Low (65 mmHg): 51      | 38            | 65 $\pm$ 13                |                            |                                                  |                                                                                                                    |
|                        |           |           |          | High (85-100 mmHg): 51 | 39            | 65 $\pm$ 12                |                            |                                                  |                                                                                                                    |
| <b>Grand 2020</b>      | Europe    | 1         | OHCA     | 49                     | 43 (87.8%)    |                            | N/A                        | CCF: 3, CAD: 6<br>PCI: 2, CABG: 0,               | HTN: 10, Stroke: 2, Pulmonary disease: 0, Nephropathy: 6                                                           |
|                        |           |           |          | Low (65 mmHg): 26      | 24            | 59 $\pm$ 13                |                            |                                                  |                                                                                                                    |
|                        |           |           |          | High (72 mmHg): 23     | 19            | 63 $\pm$ 10                |                            |                                                  |                                                                                                                    |
| <b>Jakkula 2018</b>    | Europe    | 7         | OHCA     | 120                    | 98 (81.7%)    |                            | 86 $\pm$ 19<br>83 $\pm$ 14 | NYHA 4 HF: 0<br>NYHA 4 HF: 2                     | HTN: 26, Asthma: 5, Smoker: 20<br>HTN: 34, Asthma: 3, Smoker: 20                                                   |
|                        |           |           |          | Low (65-75 mmHg): 60   | 48            | 61 $\pm$ 11                |                            |                                                  |                                                                                                                    |
|                        |           |           |          | High (80-100 mmHg): 60 | 50            | 58 $\pm$ 14                |                            |                                                  |                                                                                                                    |
| <b>Kjaergaard 2022</b> | Europe    | 2         | OHCA     | 789                    | 636 (80.6%)   |                            | N/A                        | MI: 78, AF: 60, HF: 72<br>MI: 94, AF: 67, HF: 65 | HTN: 186, DM: 62, COPD: 33, Stroke: 36, CKD: 17, RRT: 2<br>HTN: 176, DM: 48, COPD: 30, Stroke: 23, CKD: 22, RRT: 2 |
|                        |           |           |          | Low (63 mmHg): 396     | 320           | 62 $\pm$ 14                |                            |                                                  |                                                                                                                    |
|                        |           |           |          | High (77 mmHg): 393    | 316           | 63 $\pm$ 13                |                            |                                                  |                                                                                                                    |

**Supplementary Table S4c: Demographics of observational studies in sensitivity analysis**

| Study             | Continent           | Hospitals | Location | Sample Size                | Male Patients | Age (years),<br>Mean $\pm$ SD | Weight (kg),<br>Mean $\pm$ SD | Cardiac History                     | Other Comorbidities                                                             |
|-------------------|---------------------|-----------|----------|----------------------------|---------------|-------------------------------|-------------------------------|-------------------------------------|---------------------------------------------------------------------------------|
| <b>Grand 2019</b> | Europe<br>Australia | 36        | OHCA     | 851                        | 699 (82.1%)   |                               | N/A                           |                                     |                                                                                 |
|                   |                     |           |          | Low (<70 mmHg): 188        | 162           | 66 $\pm$ 12                   |                               | CAD: 54, MI: 45,<br>CA: 3, CCF: 13  | HTN: 61, DM: 29,<br>Asthma/COPD: 15, RRT: 2,<br>Stroke/TIA: 16, Alcoholism: 1   |
|                   |                     |           |          | High (70-80 mmHg): 364     | 299           | 63 $\pm$ 13                   |                               | CAD: 105, MI: 88,<br>CA: 9, CCF: 26 | HTN: 139, DM: 49,<br>Asthma/COPD: 40, RRT: 3,<br>Stroke/TIA: 25, Alcoholism: 16 |
|                   |                     |           |          | High (>80 mmHg): 299       | 238           | 63 $\pm$ 12                   |                               | CAD: 68, MI: 46,<br>CCF: 17         | HTN: 134, DM: 44,<br>Asthma/COPD: 31, RRT: 1,<br>Stroke/TIA: 25, Alcoholism: 13 |
| <b>Russo 2017</b> | North<br>America    | 1         | OHCA     | 122                        | 93 (76.2%)    |                               |                               |                                     |                                                                                 |
|                   |                     |           |          | Low (<70 mmHg): 20         | 10            | 66 $\pm$ 12                   | 81 $\pm$ 16                   | MI: 4, PCI: 4,<br>CABG: 0           | HTN: 13, DM: 3, DLD: 10,<br>Stroke/TIA: 2, Smoker: 7                            |
|                   |                     |           |          | High (70 to <80 mmHg): 67  | 55            | 58 $\pm$ 14                   | 87 $\pm$ 18                   | MI: 13, PCI: 4,<br>CABG: 1          | HTN: 28, DM: 14, DLD: 27,<br>Stroke/TIA: 3, Smoker: 28                          |
|                   |                     |           |          | High ( $\geq$ 80 mmHg): 35 | 28            | 56 $\pm$ 11                   | 85 $\pm$ 18                   | MI: 6, PCI: 3,<br>CABG: 2           | HTN: 16, DM: 4, DLD: 13,<br>Stroke/TIA: 2, Smoker: 17                           |

Note: CI, confidence intervals; MAP, mean arterial pressure; \*Low and High, treatment groups with low and high MAP targets; MI, myocardial infarction; CS, cardiac surgery; HF, heart failure; HTN, hypertension; DM, diabetes mellitus; COPD, chronic obstructive pulmonary disease; CKD, chronic kidney disease; CAD, coronary artery disease; CA, cardiac arrest; CCF, congestive cardiac failure; RRT, renal replacement therapy; TIA, transient ischaemic attack; NYHA 4 HF, NYHA Class IV heart failure; AF, atrial fibrillation; PCI, percutaneous coronary intervention; CABG, coronary artery bypass graft; DLD, dyslipidaemia.

**Supplementary Table S5a: Details of cardiac arrest in included trials**

| Study                  | MAP group/mmHg     | Arrest Location             | Bystander CPR / Defibrillation | Time to CPR (min), Median (IQR)       | Presenting Rhythm                         | Time to ROSC (min), Median (IQR) or Mean $\pm$ SD | Arrest Aetiology                                                        | MAP on admission (mmHg), Mean $\pm$ SD |
|------------------------|--------------------|-----------------------------|--------------------------------|---------------------------------------|-------------------------------------------|---------------------------------------------------|-------------------------------------------------------------------------|----------------------------------------|
| <b>Ameloot 2019</b>    | Low (65 mmHg)      | Public: 26<br>Witnessed: 46 | 26                             | N/A                                   | VF: 30<br>VT: 2<br>PEA: 2<br>Asystole: 16 | 17 (11.5-25)                                      | STEMI: 23 NSTEMI: 8<br>Arrhythmia: 11<br>Hypoxia: 4<br>Other/Unclear: 4 | 84 $\pm$ 26                            |
|                        | High (85-100 mmHg) | Public: 22<br>Witnessed: 44 | 30                             |                                       | VF: 34<br>VT: 2<br>PEA: 4<br>Asystole: 11 | 18 (12-25)                                        | STEMI: 22 NSTEMI: 6<br>Arrhythmia: 14<br>Hypoxia: 7<br>Other/Unclear: 2 | 88 $\pm$ 21                            |
| <b>Grand 2020</b>      | Low (65 mmHg)      | <u>Witnessed</u><br>26      | CPR: 24<br>Defibrillation: 4   | N/A                                   | <u>Shockable</u><br>23                    | 16 (12-36)                                        | <u>ST elevation or BBB on admission</u><br>18                           | N/A                                    |
|                        | High (72 mmHg)     | 20                          | CPR: 20<br>Defibrillation: 6   |                                       | 22                                        | 18 (13-21)                                        | 19                                                                      |                                        |
| <b>Jakkula 2018</b>    | 120                | Home: 32<br>Public: 28      | <u>CPR</u>                     | To BLS: 8 (6-10)<br>To ALS: 10 (7-12) | N/A                                       | 22 (16-27)                                        | N/A                                                                     | N/A                                    |
|                        | Low (65-75 mmHg)   |                             | 51                             |                                       |                                           |                                                   |                                                                         |                                        |
|                        | High (80-100 mmHg) | Home: 28<br>Public: 32      | 47                             | To BLS: 7 (5-9)<br>To ALS: 10 (7-12)  |                                           | 19 (15-25)                                        |                                                                         |                                        |
| <b>Kjaergaard 2022</b> | Low (63 mmHg)      | <u>Witnessed</u><br>333     | CPR: 339<br>Defibrillation: 84 | N/A                                   | Shockable: 332<br>PEA: 14                 | 21 $\pm$ 15                                       | <u>STEMI</u><br>178                                                     | N/A                                    |
|                        | High (77 mmHg)     | 339                         | CPR: 340<br>Defibrillation: 98 |                                       | Shockable: 335<br>PEA: 21                 | 21 $\pm$ 13                                       | 172                                                                     |                                        |

**Supplementary Table S5b: Details of cardiac arrest of observational studies in sensitivity analysis**

| Study             | MAP group/mmHg             | Arrest Location         | Bystander CPR / Defibrillation | Time to CPR (min), Median (IQR) | Presenting Rhythm       | Time to ROSC (min), Median (IQR) or Mean $\pm$ SD | Arrest Aetiology                        | MAP on admission (mmHg), Mean $\pm$ SD |
|-------------------|----------------------------|-------------------------|--------------------------------|---------------------------------|-------------------------|---------------------------------------------------|-----------------------------------------|----------------------------------------|
| <b>Grand 2019</b> | Low (<70 mmHg)             | <u>Witnessed</u><br>174 | CPR: 145<br>Defib: 18          | N/A                             | <u>Shockable</u><br>161 | 25 (17-38)                                        | <u>ST elevation on admission</u><br>108 | N/A                                    |
|                   | High (70-80 mmHg)          | 331                     | CPR: 271<br>Defib: 36          |                                 | 298                     | 25 (16-37)                                        | 142                                     |                                        |
|                   | High (>80 mmHg)            | 147                     | CPR: 208 Defib: 32             |                                 | 227                     | 25 (16-39)                                        | 105                                     |                                        |
| <b>Russo 2017</b> | 122                        | <u>Witnessed</u>        | <u>CPR</u>                     | N/A                             | N/A                     |                                                   | <u>STEMI</u>                            | N/A                                    |
|                   | Low (<70 mmHg)             | 17                      | 13                             |                                 |                         | 24 (13-30)                                        | 10                                      |                                        |
|                   | High (70 to <80 mmHg)      | 54                      | 39                             |                                 |                         | 21 (14-30)                                        | 36                                      |                                        |
|                   | High ( $\geq$ 80 mmHg): 35 | 28                      | 19                             |                                 |                         | 19 (14-29)                                        | 16                                      |                                        |

Note. \*Low, Medium and High, treatment groups with low, medium and high MAP targets; MAP, mean arterial pressure; CPR, cardiopulmonary resuscitation; ROSC, return of spontaneous circulation; SD, standard deviation; VF, ventricular fibrillation; VT, ventricular tachycardia; PEA, pulseless electrical activity; STEMI, ST-elevation myocardial infarction; NSTEMI, non-ST-elevation myocardial infarction; BBB, bundle branch block; BLS, basic life support; ALS, advanced life support.

**Supplementary Table S6a: Details of treatment of included trials**

| Study        | MAP group/<br>mmHg* | Duration MAP<br>targets were<br>recorded or<br>maintained                | Angiography<br>done | PCI done | Inotropes given                                                                                                        | TTM                                                                                                                                                                                                                           | Others                                                                                            |
|--------------|---------------------|--------------------------------------------------------------------------|---------------------|----------|------------------------------------------------------------------------------------------------------------------------|-------------------------------------------------------------------------------------------------------------------------------------------------------------------------------------------------------------------------------|---------------------------------------------------------------------------------------------------|
| Ameloot 2019 | Low: 65             | Maintained for 36<br>hour intervention<br>period upon ICU<br>admission   | 44/51               | 28/51    | Fluids, inotropes and<br>vasopressors were at<br>the discretion of<br>treating physicians                              | Therapeutic hypothermia was<br>administered in all patients by<br>endovascular or or surface<br>cooling systems, at 33 celsius<br>for 24 hours, with rewarming at<br>0.3 degrees celsius per hour<br>until 36 degrees celsius |                                                                                                   |
|              | High: 85 to 100     |                                                                          | 45/51               | 27/51    | Fluids, inotropes and<br>vasopressors were<br>given with a predefined<br>flow-chart to target an<br>MAP of 85-100 mmHg |                                                                                                                                                                                                                               |                                                                                                   |
| Grand 2020   | Low: 65             | Maintained for a 48<br>hour intervention<br>period from<br>randomisation | 25/26               | 11/26    | Dose of noradrenaline:<br>1013 (488-4803) pg/ml                                                                        | Target temperature was<br>induced and maintained at 36<br>degrees Celsius for 24 hour<br>after randomisation, followed<br>by active rewarming of no more<br>than 0.5 degrees celsius per<br>hour to 37 degrees celsius        | Dose of prehospital<br>adrenaline: 1.5 (0-3)<br>mg                                                |
|              | High: 72            |                                                                          | 21/23               | 15/23    | Dose of noradrenaline:<br>2939 (699-4837) pg/ml                                                                        |                                                                                                                                                                                                                               | Dose of prehospital<br>adrenaline: 1 (0-2)<br>mg                                                  |
| Jakkula 2018 | Low: 65 to 75       | Maintained for 36<br>hour intervention<br>period upon ICU<br>admission   | 35/60               |          | Dose of noradrenaline:<br>0.06 ± 0.08 ug/kg/min                                                                        | 33 degrees celsius: 42<br>36 degrees celsius: 18                                                                                                                                                                              | Prehospital<br>thrombolysis: 3<br>Prehospital cooling: 4<br>Intubated during<br>resuscitation: 26 |
|              | High: 80 to 100     |                                                                          | 28/60               |          | Dose of noradrenaline:<br>0.08 ± 0.11 ug/mg/min                                                                        | 33 degrees celsius: 41<br>36 degrees celsius: 19                                                                                                                                                                              | Prehospital<br>thrombolysis: 1<br>Prehospital cooling: 6<br>Intubated during<br>resuscitation: 31 |
| Kjaergaard   | Low: 63             | Maintained for 48<br>hour intervention<br>period from<br>randomisation   | 358/396             | 165/396  | Norepinephrine<br>infusions and dopamine<br>infusion for a maximal<br>dose of 10ug/kg/min                              | Targeted temperature<br>management at 36 degrees<br>celsius for 24 hours, with<br>subsequent rewarming of less<br>than 0.5 degrees celsius per<br>hour                                                                        |                                                                                                   |
|              | High: 77            |                                                                          | 364/393             | 171/393  |                                                                                                                        |                                                                                                                                                                                                                               |                                                                                                   |

**Supplementary Table S6b: Details of treatment of observational studies in sensitivity analysis**

| Study      | MAP group/<br>mmHg* | Duration MAP targets<br>were recorded or<br>maintained                              | Angiography<br>done | PCI done | Inotropes given                                                                             | TTM                                                                                                                                                                                                 | Others                                                          |
|------------|---------------------|-------------------------------------------------------------------------------------|---------------------|----------|---------------------------------------------------------------------------------------------|-----------------------------------------------------------------------------------------------------------------------------------------------------------------------------------------------------|-----------------------------------------------------------------|
| Grand 2019 | Low: <70            | Recorded up till 28<br>hours after<br>randomisation at 0, 4,<br>12, 20 and 28 hours | 138/188             | 100/188  | High vasopressor<br>(dopamine and<br>norepinephrine)<br>need: 91                            | Target temperature was<br>induced and maintained<br>for 28 hour after<br>randomisation, followed<br>by active rewarming of no<br>more than 0.5 degrees<br>celsius per hour to 37<br>degrees celsius |                                                                 |
|            | High: 70 to 80 (75) |                                                                                     | 223/364             | 160/364  | High vasopressors<br>need: 172                                                              |                                                                                                                                                                                                     |                                                                 |
|            | High: >80           |                                                                                     | 179/299             | 117/299  | High vasopressors<br>need: 125                                                              |                                                                                                                                                                                                     |                                                                 |
| Russo 2017 | Low: <70            | Recorded for 96 hours<br>following ICU<br>admission                                 | 17/20               |          | Prolonged vasoactive<br>agent use: 15<br>Prolonged high dose<br>vasoactive agent<br>use: 14 | Targeted temperature<br>management for 96<br>hours                                                                                                                                                  | Transfer to cardiac<br>ICU from<br>neighbouring<br>hospital: 12 |
|            | High: 70 to <80     |                                                                                     | 55/67               |          | Prolonged vasoactive<br>agent use: 51<br>Prolonged high dose<br>vasoactive agent<br>use: 30 |                                                                                                                                                                                                     | Transfer to cardiac<br>ICU from<br>neighbouring<br>hospital: 47 |
|            | High: ≥ 80          |                                                                                     | 29/35               |          | Prolonged vasoactive<br>agent use: 12<br>Prolonged high dose<br>vasoactive agent<br>use: 29 |                                                                                                                                                                                                     | Transfer to cardiac<br>ICU from<br>neighbouring<br>hospital: 25 |

Note: MAP, mean arterial pressure; PCI, percutaneous coronary intervention; TTM, targeted temperature management; ICU, intensive care unit;

**Supplementary Table S7a: Risk of bias evaluation for included trials**

| Author         | Risk of bias arising from the randomisation process | Deviations from the intended interventions | Missing outcome data | Risk of bias in measurement of the outcome | Risk of bias in selection of the reported result | Other sources | Overall       |
|----------------|-----------------------------------------------------|--------------------------------------------|----------------------|--------------------------------------------|--------------------------------------------------|---------------|---------------|
| Ameloot 2019   | Low risk                                            | Low risk                                   | Low risk             | Low risk                                   | Low risk                                         | Low risk      | Low risk      |
| Grand 2020     | Low risk                                            | Low risk                                   | Low risk             | Low risk                                   | Low risk                                         | Low risk      | Low risk      |
| Jakkula 2018   | Low risk                                            | Low risk                                   | Low risk             | Some concerns                              | Low risk                                         | Low risk      | Some concerns |
| Kjaegaard 2022 | Low risk                                            | Low risk                                   | Low risk             | Low risk                                   | Low risk                                         | Low risk      | Low risk      |

**Supplementary Table S7b: Risk of bias evaluation for observational studies in sensitivity analysis**

|            | SELECTION DOMAIN                      |                                 |                           |                                                                              | COMPARABILITY DOMAIN                                                                       | OUTCOME DOMAIN        |                                                                                                                        |                                  |                              |           |
|------------|---------------------------------------|---------------------------------|---------------------------|------------------------------------------------------------------------------|--------------------------------------------------------------------------------------------|-----------------------|------------------------------------------------------------------------------------------------------------------------|----------------------------------|------------------------------|-----------|
| Author     | Representative-ness of exposed cohort | Selection of non-exposed cohort | Ascertainment of exposure | Demonstration that outcome of interest was not present at start of the study | Comparability of cohorts on the basis of the design or analysis controlled for confounders | Assessment of outcome | Was follow up long enough for outcomes to occur (state the median duration of follow up and a brief rationale as well) | Adequacy of follow up of cohorts | Newcastle Ottawa Scale Score | Overall   |
| Grand 2019 | X                                     | X                               | X                         | X                                                                            |                                                                                            | X                     | X                                                                                                                      | X                                | 7                            | High risk |
| Russo 2017 | X                                     | X                               | X                         | X                                                                            |                                                                                            | X                     | X                                                                                                                      | X                                | 7                            | High risk |

**Supplementary Table S8: Grading of Recommendations, Assessment, Development, and Evaluations**

| Certainty assessment                                                     |                   |              |                      |              |                           |                      | № of patients      |                   | Effect                 |                                                 | Certainty     | Importance |
|--------------------------------------------------------------------------|-------------------|--------------|----------------------|--------------|---------------------------|----------------------|--------------------|-------------------|------------------------|-------------------------------------------------|---------------|------------|
| № of studies                                                             | Study design      | Risk of bias | Inconsistency        | Indirectness | Imprecision               | Other considerations | higher MAP targets | lower MAP targets | Relative (95% CI)      | Absolute (95% CI)                               |               |            |
| In-hospital mortality (follow-up: 180 days; assessed with: OR)           |                   |              |                      |              |                           |                      |                    |                   |                        |                                                 |               |            |
| 4                                                                        | randomised trials | not serious  | not serious          | not serious  | serious <sup>a</sup>      | none                 | 180/527 (34.2%)    | 172/533 (32.3%)   | OR 1.09 (0.84 to 1.42) | 19 more per 1,000 (from 37 fewer to 81 more)    | ⊕⊕⊕○ Moderate | CRITICAL   |
| Favourable neurological outcome (follow-up: 180 days; assessed with: OR) |                   |              |                      |              |                           |                      |                    |                   |                        |                                                 |               |            |
| 4                                                                        | randomised trials | not serious  | not serious          | not serious  | serious <sup>b</sup>      | none                 | 332/527 (63.0%)    | 337/533 (63.2%)   | OR 0.99 (0.77 to 1.27) | 2 fewer per 1,000 (from 63 fewer to 54 more)    | ⊕⊕⊕○ Moderate | CRITICAL   |
| Neuron specific enolase levels (assessed with: mean difference)          |                   |              |                      |              |                           |                      |                    |                   |                        |                                                 |               |            |
| 4                                                                        | randomised trials | not serious  | not serious          | not serious  | very serious <sup>c</sup> | none                 | 527                | 533               | -                      | MD 0.32 mcg/L higher (1.9 lower to 2.53 higher) | ⊕⊕○○ Low      | IMPORTANT  |
| Arrhythmia (assessed with: OR)                                           |                   |              |                      |              |                           |                      |                    |                   |                        |                                                 |               |            |
| 2                                                                        | randomised trials | not serious  | serious <sup>d</sup> | not serious  | serious <sup>e</sup>      | none                 | 66/444 (14.9%)     | 67/447 (15.0%)    | OR 0.67 (0.18 to 2.50) | 44 fewer per 1,000 (from 119 fewer to 156 more) | ⊕⊕○○ Low      | IMPORTANT  |
| Acute kidney injury (assessed with: OR)                                  |                   |              |                      |              |                           |                      |                    |                   |                        |                                                 |               |            |
| 2                                                                        | randomised trials | not serious  | serious <sup>f</sup> | not serious  | Serious <sup>g</sup>      | none                 | 44/416 (10.6%)     | 48/422 (11.4%)    | OR 0.74 (0.27 to 2.03) | 27 fewer per 1,000 (from 80 fewer to 93 more)   | ⊕⊕○○ Low      | IMPORTANT  |
| Days of mechanical ventilation (assessed with: mean difference)          |                   |              |                      |              |                           |                      |                    |                   |                        |                                                 |               |            |
| 3                                                                        | randomised trials | not serious  | not serious          | not serious  | not serious               | none                 | 134                | 137               | -                      | MD 0.91 days fewer (1.51 fewer to 0.31 fewer)   | ⊕⊕⊕⊕ High     | IMPORTANT  |



| Certainty assessment |              |              |               |              |             |                      | № of patients      |                   | Effect            |                   | Certainty | Importance |
|----------------------|--------------|--------------|---------------|--------------|-------------|----------------------|--------------------|-------------------|-------------------|-------------------|-----------|------------|
| № of studies         | Study design | Risk of bias | Inconsistency | Indirectness | Imprecision | Other considerations | higher MAP targets | lower MAP targets | Relative (95% CI) | Absolute (95% CI) |           |            |

**Days of intensive care unit stay (assessed with: mean difference)**

|   |                   |             |             |             |             |      |     |     |   |                                                         |              |           |
|---|-------------------|-------------|-------------|-------------|-------------|------|-----|-----|---|---------------------------------------------------------|--------------|-----------|
| 3 | randomised trials | not serious | not serious | not serious | not serious | none | 134 | 137 | - | MD <b>0.78 days fewer</b><br>(1.54 fewer to 0.02 fewer) | ⊕⊕⊕⊕<br>High | IMPORTANT |
|---|-------------------|-------------|-------------|-------------|-------------|------|-----|-----|---|---------------------------------------------------------|--------------|-----------|

**CI:** confidence interval; **MD:** mean difference; **OR:** odds ratio

Explanations

- Confidence intervals (0.84 to 1.42) crossed the null effect of 1.
- Confidence intervals (0.77 to 1.27) crossed the null effect of 1.
- Confidence intervals of included studies demonstrated very serious imprecision, with values ranging from -30 mcg/L to +19 mcg/L, and also crossed null effect of 1.
- Heterogeneity was 84%, and there was significant variability between studies on the forest plots.
- Confidence intervals (0.18 to 2.50) crossed the null effect of 1 and differed from pooled estimates greatly.
- Heterogeneity was 51%, and there was significant variability between studies on the forest plots.
- Confidence intervals (0.27 to 2.03) crossed the null effect of 1 and differed from pooled estimates greatly

**Supplementary Table S9: Pooled data for subgroup analysis on mortality**

| Subgroup                                                 |               | Pairwise comparisons | Odds ratio | 95%-CI       |
|----------------------------------------------------------|---------------|----------------------|------------|--------------|
| Centre number<br>$P_{\text{interaction}} = 0.73$         | Single centre | 1                    | 1.45       | 0.46 to 4.61 |
|                                                          | Two centre    | 2                    | 1.11       | 0.84 to 1.47 |
|                                                          | Multicentre   | 1                    | 0.86       | 0.40 to 1.85 |
| Duration of follow up<br>$P_{\text{interaction}} = 0.79$ | 30 days       | 1                    | 0.86       | 0.40 to 1.85 |
|                                                          | 90 days       | 1                    | 1.11       | 0.82 to 1.51 |
|                                                          | 180 days      | 2                    | 1.19       | 0.62 to 2.28 |

Note: CI, confidence interval

**Supplementary Table S10: Trial sequential analysis for outcomes**

| Graph of outcome                              | Interpretation                                                                                                                                                                                                                                                                                                                                                                                                                                               |
|-----------------------------------------------|--------------------------------------------------------------------------------------------------------------------------------------------------------------------------------------------------------------------------------------------------------------------------------------------------------------------------------------------------------------------------------------------------------------------------------------------------------------|
| <p><b>Mortality</b></p>                       | <p>Trial sequential analysis for mortality between both groups of patients. The required information size is 16341, which is not achieved.</p> <p>The cumulative Z-curve does not cross the conventional (straight dark red line) and TSA-adjusted boundaries (bright red line) for benefit, showing no statistical or clinical benefit in reducing mortality.</p>                                                                                           |
| <p><b>Favourable neurological outcome</b></p> | <p>Trial sequential analysis for mortality between both groups of patients. Due to insufficient available data, the required information size is too high such that it cannot be estimated based on the graph.</p> <p>The cumulative Z-curve does not cross the conventional (straight dark red line) and TSA-adjusted boundaries (bright red line) for benefit, showing no statistical or clinical benefit in reducing favourable neurological outcome.</p> |

|                                                                                                                                 |                                                                                                                                                                                                                                                                                                                                                                                                                                                                |
|---------------------------------------------------------------------------------------------------------------------------------|----------------------------------------------------------------------------------------------------------------------------------------------------------------------------------------------------------------------------------------------------------------------------------------------------------------------------------------------------------------------------------------------------------------------------------------------------------------|
|                                                                                                                                 |                                                                                                                                                                                                                                                                                                                                                                                                                                                                |
| <p><b>Neuron-specific enolase levels</b></p> 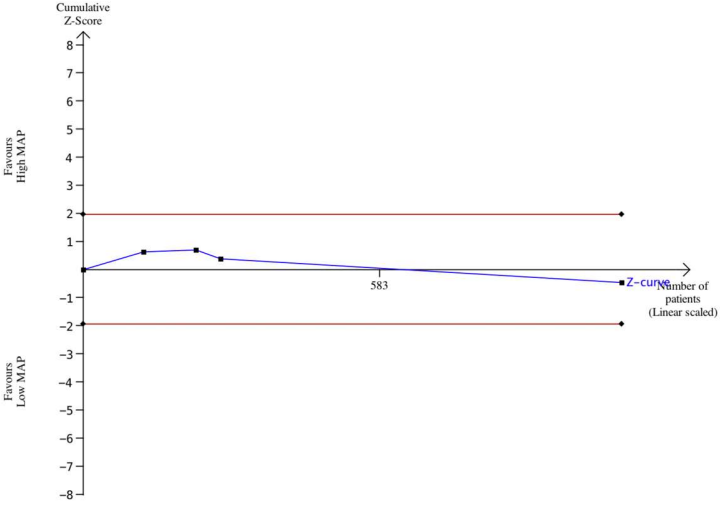 | <p>Trial sequential analysis for mortality between both groups of patients. Due to insufficient available data, the required information size is too high such that it cannot be estimated based on the graph.</p> <p>The cumulative Z-curve does not cross the conventional (straight dark red line) and TSA-adjusted boundaries (bright red line) for benefit, showing no statistical or clinical benefit in reducing levels of neuron-specific enolase.</p> |
| <p><b>Arrhythmia</b></p>                                                                                                        | <p>Trial sequential analysis for mortality between both groups of patients. The required information size is 6268, which is not achieved.</p> <p>The cumulative Z-curve does not cross the conventional (straight dark red line) and TSA-adjusted boundaries (bright red line) for benefit, showing no statistical or clinical benefit in reducing acute kidney injury</p>                                                                                     |

|                                                                                                                |                                                                                                                                                                                                                                                                                                                                                                             |
|----------------------------------------------------------------------------------------------------------------|-----------------------------------------------------------------------------------------------------------------------------------------------------------------------------------------------------------------------------------------------------------------------------------------------------------------------------------------------------------------------------|
| 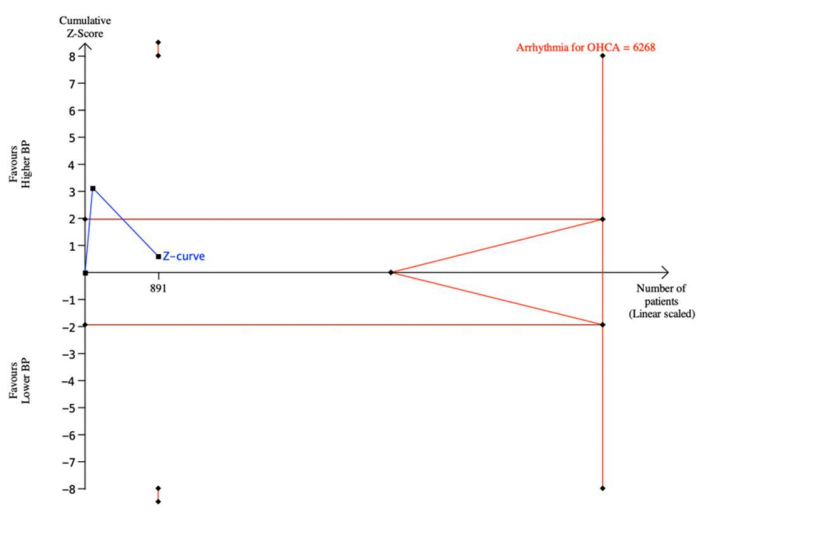                             |                                                                                                                                                                                                                                                                                                                                                                             |
| <p>Acute kidney injury</p>  | <p>Trial sequential analysis for mortality between both groups of patients. The required information size is 4458, which is not achieved.</p> <p>The cumulative Z-curve does not cross the conventional (straight dark red line) and TSA-adjusted boundaries (bright red line) for benefit, showing no statistical or clinical benefit in reducing acute kidney injury.</p> |
| <p>Mechanical ventilation time</p>                                                                             | <p>Trial sequential analysis for mortality between both groups of patients. The required information size is 241, which is achieved.</p>                                                                                                                                                                                                                                    |

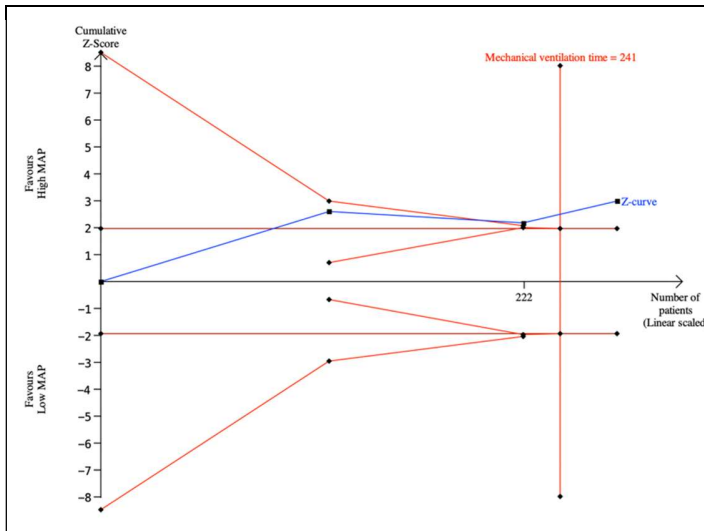

The cumulative Z-curve also crosses both the conventional (straight dark red line) and TSA-adjusted boundaries (bright red line) for benefit, showing clinical benefit in reducing mortality.

#### ICU length of stay

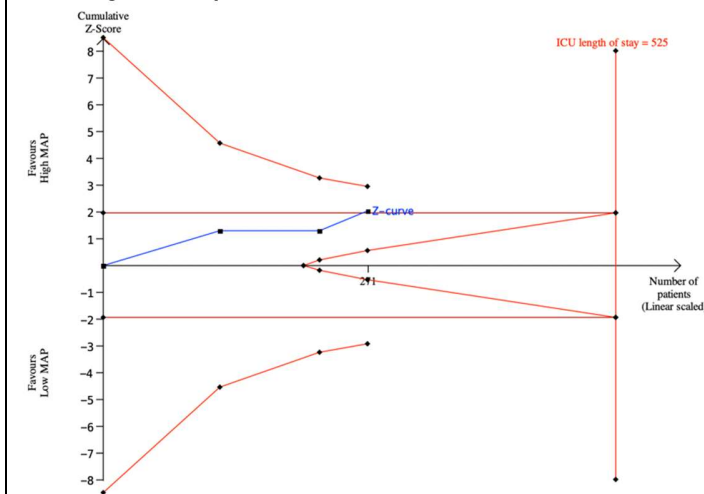

Trial sequential analysis for mortality between both groups of patients. The required information size is 525, which is not achieved.

The cumulative Z-curve crosses the conventional (straight dark red line) but not TSA-adjusted boundaries (bright red line) for benefit, showing statistical benefit in reducing mortality, but this has yet to translate to meaningful clinical benefit.

**Supplementary Table S11: Forest plots for other secondary outcomes**

| Outcome                                                                             | Forest plot                                                                           |            |        |          |          |                                                                                       |                                                                                       |                                                                                       |                          |                                                                                     |               |                    |        |
|-------------------------------------------------------------------------------------|---------------------------------------------------------------------------------------|------------|--------|----------|----------|---------------------------------------------------------------------------------------|---------------------------------------------------------------------------------------|---------------------------------------------------------------------------------------|--------------------------|-------------------------------------------------------------------------------------|---------------|--------------------|--------|
| Levels of neuron-specific enolase/ mcg/L                                            | Study                                                                                 |            |        | High MAP |          |                                                                                       | Low MAP                                                                               |                                                                                       |                          |                                                                                     |               |                    |        |
|                                                                                     |                                                                                       | Total      | Mean   | SD       | Total    | Mean                                                                                  | SD                                                                                    |                                                                                       |                          |                                                                                     |               |                    |        |
|                                                                                     | Ameloot 2019                                                                          | 51         | 58.00  | 51.87    | 51       | 63.67                                                                                 | 74.00                                                                                 | 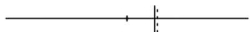   |                          | -5.67 [-30.47; 19.13]                                                               | 0.8%          |                    |        |
|                                                                                     | Grand 2020                                                                            | 23         | 25.00  | 24.50    | 26       | 21.33                                                                                 | 14.12                                                                                 |    |                          | 3.67 [-7.72; 15.06]                                                                 | 3.8%          |                    |        |
|                                                                                     | Jakkula 2018                                                                          | 60         | 22.17  | 13.14    | 60       | 23.73                                                                                 | 15.04                                                                                 |    |                          | -1.56 [-6.61; 3.49]                                                                 | 19.4%         |                    |        |
|                                                                                     | Kjaergaard 2022                                                                       | 393        | 22.00  | 19.35    | 396      | 21.00                                                                                 | 17.11                                                                                 |    |                          | 1.00 [-1.55; 3.55]                                                                  | 76.0%         |                    |        |
|                                                                                     | Random effects model                                                                  |            |        | 527      |          |                                                                                       | 533                                                                                   |                                                                                       |                          |  |               | 0.55 [-1.67; 2.78] | 100.0% |
|                                                                                     | Heterogeneity: $I^2 = 0\%$ , $\tau^2 = 0$ , $p = 0.72$                                |            |        |          |          |                                                                                       |                                                                                       |                                                                                       |                          |                                                                                     |               |                    |        |
|                                                                                     |    |            |        |          |          |                                                                                       |                                                                                       |                                                                                       |                          |                                                                                     |               |                    |        |
|                                                                                     | Incidence of arrhythmias                                                              | Study      |        |          | High MAP |                                                                                       | Low MAP                                                                               |                                                                                       | Arrhythmia               |                                                                                     |               |                    |        |
|                                                                                     |                                                                                       | Events     | Total  | Events   | Total    |                                                                                       |                                                                                       |                                                                                       |                          | OR                                                                                  | 95%-CI Weight |                    |        |
| Ameloot 2019                                                                        |                                                                                       | 7          | 51     | 17       | 51       |    |                                                                                       | 0.32 [0.12; 0.85]                                                                     |                          | 44.2%                                                                               |               |                    |        |
| Kjaergaard 2022                                                                     |                                                                                       | 59         | 393    | 50       | 396      |    |                                                                                       | 1.22 [0.81; 1.83]                                                                     |                          | 55.8%                                                                               |               |                    |        |
| Random effects model                                                                |                                                                                       |            | 444    |          | 447      |                                                                                       |    |                                                                                       | 0.67 [0.18; 2.50] 100.0% |                                                                                     |               |                    |        |
| Heterogeneity: $I^2 = 84\%$ , $\tau^2 = 0.7586$ , $p = 0.01$                        |                                                                                       |            |        |          |          |                                                                                       |                                                                                       |                                                                                       |                          |                                                                                     |               |                    |        |
|  |                                                                                       |            |        |          |          |                                                                                       |                                                                                       |                                                                                       |                          |                                                                                     |               |                    |        |
| Incidence of acute kidney injuries                                                  |                                                                                       | Study      |        |          | High MAP |                                                                                       | Low MAP                                                                               |                                                                                       | Acute kidney injury      |                                                                                     |               |                    |        |
|                                                                                     |                                                                                       |            | Events | Total    | Events   | Total                                                                                 |                                                                                       |                                                                                       |                          |                                                                                     | OR            | 95%-CI Weight      |        |
|                                                                                     |                                                                                       | Grand 2020 | 3      | 23       | 8        | 26                                                                                    |  |                                                                                       | 0.34 [0.08; 1.47]        |                                                                                     | 29.8%         |                    |        |
|                                                                                     | Kjaergaard 2022                                                                       | 41         | 393    | 40       | 396      |  |                                                                                       | 1.04 [0.65; 1.64]                                                                     |                          | 70.2%                                                                               |               |                    |        |
|                                                                                     | Random effects model                                                                  |            |        | 416      |          | 422                                                                                   |                                                                                       |  |                          | 0.74 [0.27; 2.03] 100.0%                                                            |               |                    |        |
|                                                                                     | Heterogeneity: $I^2 = 51\%$ , $\tau^2 = 0.3208$ , $p = 0.15$                          |            |        |          |          |                                                                                       |                                                                                       |                                                                                       |                          |                                                                                     |               |                    |        |
|                                                                                     |  |            |        |          |          |                                                                                       |                                                                                       |                                                                                       |                          |                                                                                     |               |                    |        |

| Duration of mechanical ventilation/ days               | <table><tr><th rowspan="2">Study</th><th colspan="3">High MAP</th><th colspan="3">Low MAP</th><th rowspan="2">Mechanical Ventilation Time</th><th rowspan="2">MD</th><th colspan="2" rowspan="2">95%-CI Weight</th></tr><tr><th>Total</th><th>Mean</th><th>SD</th><th>Total</th><th>Mean</th><th>SD</th></tr><tr><td>Ameloot 2019</td><td>51</td><td>5.67</td><td>4.58</td><td>51</td><td>8.00</td><td>8.39</td><td></td><td>-2.33</td><td>[-4.95; 0.29]</td><td>5.2%</td></tr><tr><td>Grand 2020</td><td>23</td><td>3.33</td><td>3.16</td><td>26</td><td>4.00</td><td>3.92</td><td></td><td>-0.67</td><td>[-2.65; 1.31]</td><td>9.2%</td></tr><tr><td>Jakkula 2018</td><td>60</td><td>2.72</td><td>1.23</td><td>60</td><td>3.57</td><td>2.25</td><td></td><td>-0.85</td><td>[-1.50; -0.20]</td><td>85.6%</td></tr><tr><td><b>Random effects model</b></td><td><b>527</b></td><td></td><td></td><td><b>533</b></td><td></td><td></td><td></td><td><b>-0.91</b></td><td><b>[-1.51; -0.31]</b></td><td><b>100.0%</b></td></tr><tr><td colspan="11">Heterogeneity: <math>I^2 = 0\%</math>, <math>\tau^2 = 0</math>, <math>p = 0.54</math></td></tr></table> |      |      |            |       |      |                             |              |                       |               |  | Study | High MAP |  |  | Low MAP |  |  | Mechanical Ventilation Time | MD | 95%-CI Weight |  | Total | Mean | SD | Total | Mean | SD | Ameloot 2019 | 51 | 5.67 | 4.58 | 51 | 8.00  | 8.39 |  | -2.33 | [-4.95; 0.29] | 5.2% | Grand 2020 | 23 | 3.33 | 3.16 | 26 | 4.00 | 3.92 |  | -0.67 | [-2.65; 1.31] | 9.2%  | Jakkula 2018 | 60 | 2.72 | 1.23 | 60 | 3.57 | 2.25 |  | -0.85 | [-1.50; -0.20] | 85.6% | <b>Random effects model</b> | <b>527</b> |  |  | <b>533</b> |  |  |  | <b>-0.91</b> | <b>[-1.51; -0.31]</b> | <b>100.0%</b> | Heterogeneity: $I^2 = 0\%$ , $\tau^2 = 0$ , $p = 0.54$ |  |  |  |  |  |  |  |  |  |  |
|--------------------------------------------------------|----------------------------------------------------------------------------------------------------------------------------------------------------------------------------------------------------------------------------------------------------------------------------------------------------------------------------------------------------------------------------------------------------------------------------------------------------------------------------------------------------------------------------------------------------------------------------------------------------------------------------------------------------------------------------------------------------------------------------------------------------------------------------------------------------------------------------------------------------------------------------------------------------------------------------------------------------------------------------------------------------------------------------------------------------------------------------------------------------------------------------------------------------------|------|------|------------|-------|------|-----------------------------|--------------|-----------------------|---------------|--|-------|----------|--|--|---------|--|--|-----------------------------|----|---------------|--|-------|------|----|-------|------|----|--------------|----|------|------|----|-------|------|--|-------|---------------|------|------------|----|------|------|----|------|------|--|-------|---------------|-------|--------------|----|------|------|----|------|------|--|-------|----------------|-------|-----------------------------|------------|--|--|------------|--|--|--|--------------|-----------------------|---------------|--------------------------------------------------------|--|--|--|--|--|--|--|--|--|--|
| Study                                                  | High MAP                                                                                                                                                                                                                                                                                                                                                                                                                                                                                                                                                                                                                                                                                                                                                                                                                                                                                                                                                                                                                                                                                                                                                 |      |      | Low MAP    |       |      | Mechanical Ventilation Time | MD           | 95%-CI Weight         |               |  |       |          |  |  |         |  |  |                             |    |               |  |       |      |    |       |      |    |              |    |      |      |    |       |      |  |       |               |      |            |    |      |      |    |      |      |  |       |               |       |              |    |      |      |    |      |      |  |       |                |       |                             |            |  |  |            |  |  |  |              |                       |               |                                                        |  |  |  |  |  |  |  |  |  |  |
|                                                        | Total                                                                                                                                                                                                                                                                                                                                                                                                                                                                                                                                                                                                                                                                                                                                                                                                                                                                                                                                                                                                                                                                                                                                                    | Mean | SD   | Total      | Mean  | SD   |                             |              |                       |               |  |       |          |  |  |         |  |  |                             |    |               |  |       |      |    |       |      |    |              |    |      |      |    |       |      |  |       |               |      |            |    |      |      |    |      |      |  |       |               |       |              |    |      |      |    |      |      |  |       |                |       |                             |            |  |  |            |  |  |  |              |                       |               |                                                        |  |  |  |  |  |  |  |  |  |  |
| Ameloot 2019                                           | 51                                                                                                                                                                                                                                                                                                                                                                                                                                                                                                                                                                                                                                                                                                                                                                                                                                                                                                                                                                                                                                                                                                                                                       | 5.67 | 4.58 | 51         | 8.00  | 8.39 |                             | -2.33        | [-4.95; 0.29]         | 5.2%          |  |       |          |  |  |         |  |  |                             |    |               |  |       |      |    |       |      |    |              |    |      |      |    |       |      |  |       |               |      |            |    |      |      |    |      |      |  |       |               |       |              |    |      |      |    |      |      |  |       |                |       |                             |            |  |  |            |  |  |  |              |                       |               |                                                        |  |  |  |  |  |  |  |  |  |  |
| Grand 2020                                             | 23                                                                                                                                                                                                                                                                                                                                                                                                                                                                                                                                                                                                                                                                                                                                                                                                                                                                                                                                                                                                                                                                                                                                                       | 3.33 | 3.16 | 26         | 4.00  | 3.92 |                             | -0.67        | [-2.65; 1.31]         | 9.2%          |  |       |          |  |  |         |  |  |                             |    |               |  |       |      |    |       |      |    |              |    |      |      |    |       |      |  |       |               |      |            |    |      |      |    |      |      |  |       |               |       |              |    |      |      |    |      |      |  |       |                |       |                             |            |  |  |            |  |  |  |              |                       |               |                                                        |  |  |  |  |  |  |  |  |  |  |
| Jakkula 2018                                           | 60                                                                                                                                                                                                                                                                                                                                                                                                                                                                                                                                                                                                                                                                                                                                                                                                                                                                                                                                                                                                                                                                                                                                                       | 2.72 | 1.23 | 60         | 3.57  | 2.25 |                             | -0.85        | [-1.50; -0.20]        | 85.6%         |  |       |          |  |  |         |  |  |                             |    |               |  |       |      |    |       |      |    |              |    |      |      |    |       |      |  |       |               |      |            |    |      |      |    |      |      |  |       |               |       |              |    |      |      |    |      |      |  |       |                |       |                             |            |  |  |            |  |  |  |              |                       |               |                                                        |  |  |  |  |  |  |  |  |  |  |
| <b>Random effects model</b>                            | <b>527</b>                                                                                                                                                                                                                                                                                                                                                                                                                                                                                                                                                                                                                                                                                                                                                                                                                                                                                                                                                                                                                                                                                                                                               |      |      | <b>533</b> |       |      |                             | <b>-0.91</b> | <b>[-1.51; -0.31]</b> | <b>100.0%</b> |  |       |          |  |  |         |  |  |                             |    |               |  |       |      |    |       |      |    |              |    |      |      |    |       |      |  |       |               |      |            |    |      |      |    |      |      |  |       |               |       |              |    |      |      |    |      |      |  |       |                |       |                             |            |  |  |            |  |  |  |              |                       |               |                                                        |  |  |  |  |  |  |  |  |  |  |
| Heterogeneity: $I^2 = 0\%$ , $\tau^2 = 0$ , $p = 0.54$ |                                                                                                                                                                                                                                                                                                                                                                                                                                                                                                                                                                                                                                                                                                                                                                                                                                                                                                                                                                                                                                                                                                                                                          |      |      |            |       |      |                             |              |                       |               |  |       |          |  |  |         |  |  |                             |    |               |  |       |      |    |       |      |    |              |    |      |      |    |       |      |  |       |               |      |            |    |      |      |    |      |      |  |       |               |       |              |    |      |      |    |      |      |  |       |                |       |                             |            |  |  |            |  |  |  |              |                       |               |                                                        |  |  |  |  |  |  |  |  |  |  |
| Duration of intensive care unit stay/ days             | <table><tr><th rowspan="2">Study</th><th colspan="3">High MAP</th><th colspan="3">Low MAP</th><th rowspan="2">ICU length of stay</th><th rowspan="2">MD</th><th colspan="2" rowspan="2">95%-CI Weight</th></tr><tr><th>Total</th><th>Mean</th><th>SD</th><th>Total</th><th>Mean</th><th>SD</th></tr><tr><td>Ameloot 2019</td><td>51</td><td>8.00</td><td>5.34</td><td>51</td><td>10.33</td><td>8.39</td><td></td><td>-2.33</td><td>[-5.06; 0.40]</td><td>7.7%</td></tr><tr><td>Grand 2020</td><td>23</td><td>4.33</td><td>3.16</td><td>26</td><td>5.67</td><td>4.71</td><td></td><td>-1.34</td><td>[-3.56; 0.88]</td><td>11.6%</td></tr><tr><td>Jakkula 2018</td><td>60</td><td>4.24</td><td>1.93</td><td>60</td><td>4.79</td><td>2.72</td><td></td><td>-0.55</td><td>[-1.39; 0.29]</td><td>80.7%</td></tr><tr><td><b>Random effects model</b></td><td><b>527</b></td><td></td><td></td><td><b>533</b></td><td></td><td></td><td></td><td><b>-0.78</b></td><td><b>[-1.54; -0.02]</b></td><td><b>100.0%</b></td></tr><tr><td colspan="11">Heterogeneity: <math>I^2 = 0\%</math>, <math>\tau^2 = 0</math>, <math>p = 0.41</math></td></tr></table>         |      |      |            |       |      |                             |              |                       |               |  | Study | High MAP |  |  | Low MAP |  |  | ICU length of stay          | MD | 95%-CI Weight |  | Total | Mean | SD | Total | Mean | SD | Ameloot 2019 | 51 | 8.00 | 5.34 | 51 | 10.33 | 8.39 |  | -2.33 | [-5.06; 0.40] | 7.7% | Grand 2020 | 23 | 4.33 | 3.16 | 26 | 5.67 | 4.71 |  | -1.34 | [-3.56; 0.88] | 11.6% | Jakkula 2018 | 60 | 4.24 | 1.93 | 60 | 4.79 | 2.72 |  | -0.55 | [-1.39; 0.29]  | 80.7% | <b>Random effects model</b> | <b>527</b> |  |  | <b>533</b> |  |  |  | <b>-0.78</b> | <b>[-1.54; -0.02]</b> | <b>100.0%</b> | Heterogeneity: $I^2 = 0\%$ , $\tau^2 = 0$ , $p = 0.41$ |  |  |  |  |  |  |  |  |  |  |
| Study                                                  | High MAP                                                                                                                                                                                                                                                                                                                                                                                                                                                                                                                                                                                                                                                                                                                                                                                                                                                                                                                                                                                                                                                                                                                                                 |      |      | Low MAP    |       |      | ICU length of stay          | MD           | 95%-CI Weight         |               |  |       |          |  |  |         |  |  |                             |    |               |  |       |      |    |       |      |    |              |    |      |      |    |       |      |  |       |               |      |            |    |      |      |    |      |      |  |       |               |       |              |    |      |      |    |      |      |  |       |                |       |                             |            |  |  |            |  |  |  |              |                       |               |                                                        |  |  |  |  |  |  |  |  |  |  |
|                                                        | Total                                                                                                                                                                                                                                                                                                                                                                                                                                                                                                                                                                                                                                                                                                                                                                                                                                                                                                                                                                                                                                                                                                                                                    | Mean | SD   | Total      | Mean  | SD   |                             |              |                       |               |  |       |          |  |  |         |  |  |                             |    |               |  |       |      |    |       |      |    |              |    |      |      |    |       |      |  |       |               |      |            |    |      |      |    |      |      |  |       |               |       |              |    |      |      |    |      |      |  |       |                |       |                             |            |  |  |            |  |  |  |              |                       |               |                                                        |  |  |  |  |  |  |  |  |  |  |
| Ameloot 2019                                           | 51                                                                                                                                                                                                                                                                                                                                                                                                                                                                                                                                                                                                                                                                                                                                                                                                                                                                                                                                                                                                                                                                                                                                                       | 8.00 | 5.34 | 51         | 10.33 | 8.39 |                             | -2.33        | [-5.06; 0.40]         | 7.7%          |  |       |          |  |  |         |  |  |                             |    |               |  |       |      |    |       |      |    |              |    |      |      |    |       |      |  |       |               |      |            |    |      |      |    |      |      |  |       |               |       |              |    |      |      |    |      |      |  |       |                |       |                             |            |  |  |            |  |  |  |              |                       |               |                                                        |  |  |  |  |  |  |  |  |  |  |
| Grand 2020                                             | 23                                                                                                                                                                                                                                                                                                                                                                                                                                                                                                                                                                                                                                                                                                                                                                                                                                                                                                                                                                                                                                                                                                                                                       | 4.33 | 3.16 | 26         | 5.67  | 4.71 |                             | -1.34        | [-3.56; 0.88]         | 11.6%         |  |       |          |  |  |         |  |  |                             |    |               |  |       |      |    |       |      |    |              |    |      |      |    |       |      |  |       |               |      |            |    |      |      |    |      |      |  |       |               |       |              |    |      |      |    |      |      |  |       |                |       |                             |            |  |  |            |  |  |  |              |                       |               |                                                        |  |  |  |  |  |  |  |  |  |  |
| Jakkula 2018                                           | 60                                                                                                                                                                                                                                                                                                                                                                                                                                                                                                                                                                                                                                                                                                                                                                                                                                                                                                                                                                                                                                                                                                                                                       | 4.24 | 1.93 | 60         | 4.79  | 2.72 |                             | -0.55        | [-1.39; 0.29]         | 80.7%         |  |       |          |  |  |         |  |  |                             |    |               |  |       |      |    |       |      |    |              |    |      |      |    |       |      |  |       |               |      |            |    |      |      |    |      |      |  |       |               |       |              |    |      |      |    |      |      |  |       |                |       |                             |            |  |  |            |  |  |  |              |                       |               |                                                        |  |  |  |  |  |  |  |  |  |  |
| <b>Random effects model</b>                            | <b>527</b>                                                                                                                                                                                                                                                                                                                                                                                                                                                                                                                                                                                                                                                                                                                                                                                                                                                                                                                                                                                                                                                                                                                                               |      |      | <b>533</b> |       |      |                             | <b>-0.78</b> | <b>[-1.54; -0.02]</b> | <b>100.0%</b> |  |       |          |  |  |         |  |  |                             |    |               |  |       |      |    |       |      |    |              |    |      |      |    |       |      |  |       |               |      |            |    |      |      |    |      |      |  |       |               |       |              |    |      |      |    |      |      |  |       |                |       |                             |            |  |  |            |  |  |  |              |                       |               |                                                        |  |  |  |  |  |  |  |  |  |  |
| Heterogeneity: $I^2 = 0\%$ , $\tau^2 = 0$ , $p = 0.41$ |                                                                                                                                                                                                                                                                                                                                                                                                                                                                                                                                                                                                                                                                                                                                                                                                                                                                                                                                                                                                                                                                                                                                                          |      |      |            |       |      |                             |              |                       |               |  |       |          |  |  |         |  |  |                             |    |               |  |       |      |    |       |      |    |              |    |      |      |    |       |      |  |       |               |      |            |    |      |      |    |      |      |  |       |               |       |              |    |      |      |    |      |      |  |       |                |       |                             |            |  |  |            |  |  |  |              |                       |               |                                                        |  |  |  |  |  |  |  |  |  |  |



**Supplementary Table S12a: Raw data for outcomes in included trials**

| Study        | MAP group/<br>mmHg* | Mortality | Favourable neurological<br>outcome** | Arrhythmia | NSE levels mcg/L                                                                                        | Other complications                                                                                                                                                                                                                       |
|--------------|---------------------|-----------|--------------------------------------|------------|---------------------------------------------------------------------------------------------------------|-------------------------------------------------------------------------------------------------------------------------------------------------------------------------------------------------------------------------------------------|
| Ameloot 2019 | Low: 65             | 29/51     | 18/51                                | 17/51      | Day 0: 38 (28-46)<br>Day 1: 42 (28-68)<br>Day 2: 42 (26-123)<br>Day 3: 30 (18-65)<br>Day 4: 20 (15-43)  | % voxels with ADC score<br><650.10-6 mm <sup>2</sup> /s<br>Observed: 11 (8-15)<br>After imputation: 12 (9-16)<br>After imputation with non-<br>survivors set to 100%: 16 (12-21)                                                          |
|              | High: 85 to 100     | 30/51     | 21/51                                | 7/51       | Day 0: 39 (29-46)<br>Day 1: 46 (34-67)<br>Day 2: 42 (32-100)<br>Day 3: 41 (25-170)<br>Day 4: 31 (21-97) | % voxels with ADC score<br><650.10-6 mm <sup>2</sup> /s<br>Observed: 11 (8-18)<br>After imputation: 16 (13-21)<br>After imputation with non-<br>survivors set to 100%: 21 (15-28)                                                         |
| Grand 2020   | Low: 65             | 9/26      | 13/26                                |            | 24 hours: 28 (20-41)<br>48 hours: 20 (13-31)<br>Peak: 29 (21-42)                                        | ICU length of stay/days: 5 (3-9)<br>Hospital length of stay/days: 13<br>(8-29)<br>Duration of mechanical<br>ventilation/days: 3 (2-7)<br>Duration of vasopressor<br>use/days: 2 (2-3)<br>RRT: 8<br>Severe bleeding during<br>admission: 2 |
|              | High: 72            | 10/23     | 13/23                                |            | 24 hours: 21 (18-30)<br>48 hours: 18 (13-44)<br>Peak: 23 (19-44)                                        | ICU length of stay/days: 5 (2-6)<br>Hospital length of stay/days: 9 (7-<br>14)<br>Duration of mechanical<br>ventilation/days: 4 (1-5)<br>Duration of vasopressor<br>use/days: 2 (1-4)<br>RRT: 3<br>Severe bleeding during<br>admission: 1 |
| Jakkula 2018 | Low: 65 to 75       | 20/60     | 37/60                                |            | 21.2 (15.1-34.9)                                                                                        | Mechanical ventilation<br>duration/hours: 82 (52-123)                                                                                                                                                                                     |
|              | High: 80 to 100     | 18/60     | 41/60                                |            | 22 (13.6-30.9)                                                                                          | Mechanical ventilation<br>duration/hours: 59 (49-88)                                                                                                                                                                                      |

|            |          |         |         |        |            |                                                                                                                                      |
|------------|----------|---------|---------|--------|------------|--------------------------------------------------------------------------------------------------------------------------------------|
| Kjaergaard | Low: 63  | 114/396 | 269/396 | 50/396 | 18 (11-34) | Seizure: 88<br>Infection: 110<br>Any bleeding: 92<br>Uncontrolled bleeding: 16<br>Electrolyte disorder: 34<br>Metabolic disorder: 31 |
|            | High: 77 | 122/393 | 260/393 | 59/393 | 18 (11-37) | Seizure: 76<br>Infection: 102<br>Any bleeding: 82<br>Uncontrolled bleeding: 22<br>Electrolyte disorder: 23<br>Metabolic disorder: 31 |

**Supplementary Table S12b: Raw data for outcomes in observational studies in sensitivity analysis**

| Study      | MAP group/<br>mmHg* | Mortality | Favourable neurological<br>outcome** | Arrhythmia | NSE levels mcg/L | Other complications |
|------------|---------------------|-----------|--------------------------------------|------------|------------------|---------------------|
| Grand 2019 | Low: <70            | 86/188    |                                      | 53/188     |                  | AKI: 102<br>AKI: 25 |
|            | High: 70 to 80 (75) | 162/364   |                                      | 103/364    |                  | AKI: 164<br>RRT: 43 |
|            | High: >80           | 137/299   |                                      | 74/299     |                  | AKI: 126<br>RRT: 13 |
| Russo 2017 | Low: <70            | 11/20     | 8/20                                 |            |                  | Major bleeding: 10  |
|            | High: 70 to <80     | 14/67     | 49/67                                |            |                  | Major bleeding: 25  |
|            | High: ≥ 80          | 4/35      | 26/35                                |            |                  | Major bleeding: 13  |

Note:

\*: If an MAP range was given, MAP was taken as the midpoint of the range

\*\* : Favourable neurological outcome was defined as a Cerebral Performance Category of 1 or 2, or a modified Rankin score of 0 to 2

MAP, mean arterial pressure; NSE, neuron-specific enolase; ADC, apparent diffusion coefficient; ICU, intensive care unit; RRT, renal replacement therapy; AKI, acute kidney injury
